# Supplementary material
Source: PubMed Central journal article supplement (PMC5808406)
Supplement: NIHMS937531-supplement-Suppl_Files.pdf [file NIHMS937531-supplement-Suppl_Files.pdf]

**Cell, Volume 171**

## **Supplemental Information**

### **Epigenetic Therapy Ties MYC Depletion to Reversing Immune Evasion and Treating Lung Cancer**

**Michael J. Topper, Michelle Vaz, Katherine B. Chiappinelli, Christina E. DeStefano Shields, Noushin Niknafs, Ray-Whay Chiu Yen, Alyssa Wenzel, Jessica Hicks, Matthew Ballew, Meredith Stone, Phuoc T. Tran, Cynthia A. Zahnov, Matthew D. Hellmann, Valsamo Anagnostou, Pamela L. Strissel, Reiner Strick, Victor E. Velculescu, and Stephen B. Baylin**

**Table S1:** Primer sequences used in the study (Related to STAR methods).

| Primers for qRT-PCR |                           |                          |
|---------------------|---------------------------|--------------------------|
| Gene                | Forward Primer            | Reverse primer           |
| <i>OASL1</i>        | TCGTGAAACATCGGCCAACT      | ACCTGGCTTTCACATACTGCT    |
| <i>HLA-A</i>        | TCAGATAGAAAAGGAGGGAGTTACA | ACAAGCTGTGAGGGACACAT     |
| <i>HLA-B</i>        | CCTGAGATGGGAGCCGTCTT      | CTCCGATGACCACAACCTGCT    |
| <i>CCL5</i>         | TGCTGCTTTGCCTACATTGC      | CTTGACCTGTGGACGACTGC     |
| <i>CT45A1</i>       | GCACCTGTGGGAGGAAACG       | CCTGACTGCAGTAGGTCCTTG    |
| <i>SPANXB1</i>      | TGTGAATCCAACGAGGCCAACG    | CCACTAGTATGGTCGAGGACTC   |
| <i>Beta Actin</i>   | CAACCGCGAGAAGATGACC       | TAGCACAGCCTGGATAGCAA     |
| <i>Syn-1</i>        | ATGGAGCCCAAGATGCAG        | AGATCGTGGGCTAGCAG        |
| <i>ERV3</i>         | AACTAATGCCCAAGATAATTTCA   | TTAAGAACCAGATGCTCTGACTTG |
| <i>ERV9-1</i>       | TCTTGGAGTCCTCACTCAAACCTC  | ACTGCTGCAACTACCCTTAAACA  |
